# Supplementary material for: Cetuximab is efficient and safe in patients with advanced cutaneous squamous cell carcinoma: a retrospective, multicentre study
Source: PubMed Central journal article supplement (PMC6996917; doi:10.18632/oncotarget.27434), 2020-01-28
Supplement: oncotarget-11-378-s001.pdf [file oncotarget-11-378-s001.pdf]

## **Cetuximab is efficient and safe in patients with advanced cutaneous squamous cell carcinoma: a retrospective, multicentre study**

### **SUPPLEMENTARY MATERIALS TABLE**

**Supplementary Table 1: Response and Disease Control Rates based on stratification of patients.**

**See Supplementary File 1**
